# Supplementary material
Source: PubMed Central journal article supplement (PMC5053802)
Supplement: CJN.13341215SupplementaryData.pdf [file CJN.13341215SupplementaryData.pdf]

**Supplemental Table 1: Mean percentage change in urinary creatinine concentration, albumin concentration and albumin:creatinine ratio in urine with preservative following a delay in processing, by baseline level of albuminuria and storage temperature**

|                                 | Mean percentage change (95% CI) |                            | Test for equality of means by temperature |
|---------------------------------|---------------------------------|----------------------------|-------------------------------------------|
|                                 | Macroalbuminuria                | Normo- or microalbuminuria |                                           |
| <b>Creatinine</b>               |                                 |                            |                                           |
| 4°C, 1 day                      | -0.4% (-0.7 to -0.1%)           | 0.1% (-0.4 to 0.5%)        | 0.46                                      |
| 4°C, 2 days                     | -0.0% (-0.4 to 0.4%)            | 0.2% (-0.2 to 0.7%)        |                                           |
| 4°C, 4 days                     | -0.2% (-0.6 to 0.2%)            | 0.1% (-0.3 to 0.5%)        |                                           |
| 4°C, 7 days                     | 0.8% (0.2 to 1.3%)              | 0.5% (0.1 to 0.9%)         |                                           |
| 18°C, 1 day                     | -0.4% (-0.8 to 0.1%)            | 0.1% (-0.4 to 0.5%)        | 0.97                                      |
| 18°C, 2 days                    | -0.2% (-0.5 to 0.2%)            | 0.1% (-0.3 to 0.5%)        |                                           |
| 18°C, 4 days                    | -0.1% (-0.8 to 0.7%)            | -0.1% (-0.7 to 0.5%)       |                                           |
| 18°C, 7 days                    | 0.7% (-0.7 to 2.0%)             | 0.0% (-0.7 to 0.7%)        |                                           |
| 30°C, 1 day                     | -0.6% (-1.0 to -0.2%)           | -0.5% (-1.0 to -0.0%)      | 0.09                                      |
| 30°C, 2 days                    | -0.5% (-1.0 to 0.1%)            | -0.8% (-1.2 to -0.3%)      |                                           |
| 30°C, 4 days                    | -0.3% (-2.0 to 1.5%)            | -1.8% (-2.5 to -1.0%)      |                                           |
| 30°C, 7 days                    | -1.3% (-3.1 to 0.4%)            | -2.9% (-4.0 to -1.7%)      |                                           |
| <b>Albumin</b>                  |                                 |                            |                                           |
| 4°C, 1 day                      | -3.5% (-6.4 to -0.6%)           | 1.1% (-0.6 to 2.7%)        | 0.01                                      |
| 4°C, 2 days                     | -4.3% (-6.4 to -2.2%)           | -0.5% (-2.8 to 1.7%)       |                                           |
| 4°C, 4 days                     | -2.7% (-5.5 to 0.1%)            | 0.8% (-0.8 to 2.3%)        |                                           |
| 4°C, 7 days                     | -0.2% (-2.1 to 1.8%)            | 0.6% (-2.0 to 3.2%)        |                                           |
| 18°C, 1 day                     | -2.5% (-4.8 to -0.2%)           | 1.8% (-0.9 to 4.5%)        | 0.04                                      |
| 18°C, 2 days                    | -2.7% (-4.9 to -0.5%)           | 0.8% (-1.0 to 2.6%)        |                                           |
| 18°C, 4 days                    | -1.1% (-4.3 to 2.1%)            | 1.6% (-0.8 to 4.1%)        |                                           |
| 18°C, 7 days                    | 2.1% (-0.3 to 4.4%)             | 2.1% (-0.2 to 4.4%)        |                                           |
| 30°C, 1 day                     | -0.3% (-2.5 to 1.9%)            | 1.3% (-0.8 to 3.4%)        | 0.11                                      |
| 30°C, 2 days                    | -0.8% (-3.1 to 1.5%)            | 2.5% (0.2 to 4.7%)         |                                           |
| 30°C, 4 days                    | 0.2% (-4.4 to 4.7%)             | 4.0% (1.1 to 6.8%)         |                                           |
| 30°C, 7 days                    | 4.2% (0.6 to 7.8%)              | 4.7% (1.4 to 8.0%)         |                                           |
| <b>Albumin:creatinine ratio</b> |                                 |                            |                                           |
| 4°C, 1 day                      | -3.1% (-6.1 to -0.1%)           | 0.9% (-0.8 to 2.6%)        | 0.02                                      |
| 4°C, 2 days                     | -4.2% (-6.4 to -2.1%)           | -0.8% (-3.2 to 1.5%)       |                                           |
| 4°C, 4 days                     | -2.5% (-5.3 to 0.3%)            | 0.6% (-1.0 to 2.2%)        |                                           |
| 4°C, 7 days                     | -0.9% (-3.0 to 1.2%)            | 0.1% (-2.5 to 2.7%)        |                                           |
| 18°C, 1 day                     | -2.2% (-4.5 to 0.2%)            | 1.8% (-1.0 to 4.5%)        | 0.04                                      |
| 18°C, 2 days                    | -2.5% (-4.7 to -0.4%)           | 0.7% (-1.2 to 2.5%)        |                                           |
| 18°C, 4 days                    | -1.0% (-4.2 to 2.2%)            | 1.7% (-0.8 to 4.2%)        |                                           |
| 18°C, 7 days                    | 1.4% (-0.9 to 3.7%)             | 2.1% (-0.2 to 4.3%)        |                                           |
| 30°C, 1 day                     | 0.3% (-2.0 to 2.5%)             | 1.7% (-0.3 to 3.8%)        | 0.03                                      |
| 30°C, 2 days                    | -0.3% (-2.7 to 2.0%)            | 3.2% (0.9 to 5.5%)         |                                           |
| 30°C, 4 days                    | 0.4% (-4.3 to 5.1%)             | 5.7% (3.2 to 8.3%)         |                                           |
| 30°C, 7 days                    | 5.6% (2.6 to 8.6%)              | 7.8% (4.4 to 11.1%)        |                                           |

**Supplemental Table 2: Mean percentage change in urinary creatinine concentration, albumin concentration and albumin:creatinine ratio after freeze-thaw cycles, by preservative use**

|                          | Mean percentage change (95% CI) |                      | Test for equality of means |
|--------------------------|---------------------------------|----------------------|----------------------------|
|                          | Preservative                    | No preservative      |                            |
| Creatinine               |                                 |                      |                            |
| One freeze-thaw          | -0.1% (-0.4 to 0.2%)            | -0.4% (-0.9 to 0.1%) | 0.36                       |
| Two freeze-thaws         | -0.0% (-0.3 to 0.3%)            | 0.0% (-0.2 to 0.3%)  | 0.74                       |
| Three freeze-thaws       | 0.1% (-0.2 to 0.4%)             | 0.3% (-0.0 to 0.6%)  | 0.47                       |
| Albumin                  |                                 |                      |                            |
| One freeze-thaw          | -0.8% (-2.3 to 0.7%)            | 0.3% (-2.0 to 2.6%)  | 0.39                       |
| Two freeze-thaws         | -1.1% (-3.3 to 1.0%)            | 1.3% (-1.5 to 4.0%)  | 0.06                       |
| Three freeze-thaws       | -0.7% (-3.0 to 1.7%)            | 2.8% (-0.3 to 6.0%)  | 0.03                       |
| Albumin:creatinine ratio |                                 |                      |                            |
| One freeze-thaw          | -0.7% (-2.2 to 0.9%)            | 0.6% (-1.6 to 2.8%)  | 0.28                       |
| Two freeze-thaws         | -1.2% (-3.4 to 0.9%)            | 1.1% (-1.6 to 3.9%)  | 0.06                       |
| Three freeze-thaws       | -1.0% (-3.3 to 1.4%)            | 2.3% (-0.7 to 5.4%)  | 0.04                       |

**Supplemental Table 3: Mean percentage change in urinary creatinine concentration, albumin concentration and albumin:creatinine ratio in urine with preservative after freeze-thaw cycles, by baseline level of albuminuria**

|                          | Mean percentage change (95% CI) |                            | Test for equality of means |
|--------------------------|---------------------------------|----------------------------|----------------------------|
|                          | Macroalbuminuria                | Normo- or microalbuminuria |                            |
| Creatinine               |                                 |                            |                            |
| One freeze-thaw          | -0.3% (-0.7 to 0.2%)            | -0.0% (-0.5 to 0.4%)       | 0.46                       |
| Two freeze-thaws         | -0.2% (-0.6 to 0.3%)            | 0.0% (-0.4 to 0.4%)        | 0.59                       |
| Three freeze-thaws       | 0.1% (-0.3 to 0.5%)             | 0.1% (-0.3 to 0.5%)        | 0.95                       |
| Albumin                  |                                 |                            |                            |
| One freeze-thaw          | -3.6% (-6.1 to -1.1%)           | 0.5% (-1.3 to 2.3%)        | 0.01                       |
| Two freeze-thaws         | -4.5% (-7.6 to -1.3%)           | 0.2% (-2.5 to 2.9%)        | 0.03                       |
| Three freeze-thaws       | -3.5% (-6.4 to -0.5%)           | 0.2% (-2.9 to 3.3%)        | 0.09                       |
| Albumin:creatinine ratio |                                 |                            |                            |
| One freeze-thaw          | -3.3% (-5.8 to -0.8%)           | 0.6% (-1.3 to 2.4%)        | 0.02                       |
| Two freeze-thaws         | -4.3% (-7.3 to -1.3%)           | 0.1% (-2.6 to 2.9%)        | 0.03                       |
| Three freeze-thaws       | -3.6% (-6.5 to -0.6%)           | 0.1% (-3.1 to 3.2%)        | 0.10                       |

**Supplemental Table 4: Mean percentage change in urinary creatinine concentration, albumin concentration and albumin:creatinine ratio after 1 and 6 month storage, by preservative use and storage temperature**

|                                 | Mean percentage change (95% CI) |                      | Test for equality of means |
|---------------------------------|---------------------------------|----------------------|----------------------------|
|                                 | Preservative                    | No preservative      |                            |
| <b>Creatinine</b>               |                                 |                      |                            |
| 1 month, -20°C                  | -0.1% (-0.5 to 0.3%)            | 0.6% (-0.3 to 1.4%)  | 0.14                       |
| 1 month, -40°C                  | 0.1% (-0.5 to 0.7%)             | 0.4% (-0.5 to 1.3%)  | 0.58                       |
| 1 month, -80°C                  | 0.1% (-0.7 to 1.0%)             | 0.5% (-0.6 to 1.5%)  | 0.62                       |
| 6 months, -20°C                 | 1.7% (1.3 to 2.1%)              | 3.1% (2.0 to 4.3%)   | 0.01                       |
| 6 months, -40°C                 | 0.1% (-0.3 to 0.5%)             | 1.1% (0.2 to 2.0%)   | 0.03                       |
| 6 months, -80°C                 | 0.1% (-0.3 to 0.6%)             | 0.7% (-0.2 to 1.6%)  | 0.27                       |
| <b>Albumin</b>                  |                                 |                      |                            |
| 1 month, -20°C                  | -9.0% (-12.2 to -5.8%)          | -3.8% (-8.3 to 0.6%) | 0.04                       |
| 1 month, -40°C                  | -1.1% (-3.1 to 0.9%)            | -2.0% (-6.5 to 2.5%) | 0.70                       |
| 1 month, -80°C                  | -2.2% (-5.5 to 1.2%)            | -1.2% (-6.1 to 3.6%) | 0.73                       |
| 6 months, -20°C                 | -22.6% (-29.3 to -15.9%)        | (-26.2 to -12.1%)    | 0.37                       |
| 6 months, -40°C                 | -2.1% (-4.1 to -0.1%)           | -2.2% (-6.5 to 2.0%) | 0.96                       |
| 6 months, -80°C                 | -0.1% (-2.5 to 2.3%)            | 1.1% (-3.9 to 6.1%)  | 0.67                       |
| <b>Albumin:creatinine ratio</b> |                                 |                      |                            |
| 1 month, -20°C                  | -8.9% (-12.1 to -5.7%)          | -4.4% (-9.4 to 0.7%) | 0.11                       |
| 1 month, -40°C                  | -1.3% (-3.4 to 0.7%)            | -2.4% (-7.6 to 2.8%) | 0.68                       |
| 1 month, -80°C                  | -2.8% (-6.3 to 0.7%)            | -1.8% (-7.2 to 3.7%) | 0.73                       |
| 6 months, -20°C                 | -23.9% (-30.5 to -17.4%)        | (-28.7 to -14.5%)    | 0.54                       |
| 6 months, -40°C                 | -2.3% (-4.4 to -0.2%)           | -3.3% (-8.2 to 1.5%) | 0.68                       |
| 6 months, -80°C                 | -0.4% (-3.0 to 2.2%)            | 0.3% (-5.3 to 5.8%)  | 0.83                       |

**Supplemental Table 5: Mean percentage change in urinary creatinine concentration, albumin concentration and albumin:creatinine ratio in urine with preservative after 1 and 6 month storage, by baseline level of albuminuria**

|                                 | Mean percentage change (95% CI) |                            | Test for equality of means |
|---------------------------------|---------------------------------|----------------------------|----------------------------|
|                                 | Macroalbuminuria                | Normo- or microalbuminuria |                            |
| <b>Creatinine</b>               |                                 |                            |                            |
| 1 month, -20°C                  | 0.2% (-0.6 to 1.0%)             | -0.3% (-0.8 to 0.1%)       | 0.22                       |
| 1 month, -40°C                  | 0.5% (-0.7 to 1.8%)             | -0.1% (-0.8 to 0.5%)       | 0.33                       |
| 1 month, -80°C                  | 1.0% (-0.7 to 2.8%)             | -0.4% (-1.3 to 0.5%)       | 0.16                       |
| 6 months, -20°C                 | 2.0% (0.9 to 3.0%)              | 1.6% (1.2 to 2.0%)         | 0.52                       |
| 6 months, -40°C                 | 0.2% (-0.5 to 0.9%)             | -0.0% (-0.4 to 0.4%)       | 0.63                       |
| 6 months, -80°C                 | 0.1% (-0.5 to 0.7%)             | 0.1% (-0.3 to 0.5%)        | 0.92                       |
| <b>Albumin</b>                  |                                 |                            |                            |
| 1 month, -20°C                  | -4.7% (-6.8 to -2.5%)           | -11.3% (-15.6 to -7.0%)    | 0.01                       |
| 1 month, -40°C                  | -4.3% (-6.5 to -2.1%)           | -0.1% (-2.5 to 2.4%)       | 0.01                       |
| 1 month, -80°C                  | -2.1% (-4.5 to 0.3%)            | -2.9% (-7.3 to 1.5%)       | 0.74                       |
| 6 months, -20°C                 | -6.4% (-9.2 to -3.6%)           | -29.9% (-38.4 to -21.4%)   | <0.001                     |
| 6 months, -40°C                 | -4.1% (-5.8 to -2.5%)           | -1.5% (-4.3 to 1.3%)       | 0.11                       |
| 6 months, -80°C                 | -1.0% (-2.9 to 1.0%)            | 0.0% (-3.2 to 3.3%)        | 0.60                       |
| <b>Albumin:creatinine ratio</b> |                                 |                            |                            |
| 1 month, -20°C                  | -4.8% (-7.0 to -2.6%)           | -10.9% (-15.3 to -6.6%)    | 0.01                       |
| 1 month, -40°C                  | -4.6% (-6.7 to -2.5%)           | 0.0% (-2.5 to 2.5%)        | 0.005                      |
| 1 month, -80°C                  | -2.9% (-4.9 to -0.8%)           | -3.2% (-7.6 to 1.2%)       | 0.90                       |
| 6 months, -20°C                 | -8.3% (-11.1 to -5.4%)          | -31.0% (-39.3 to -22.6%)   | <0.001                     |
| 6 months, -40°C                 | -4.4% (-6.3 to -2.6%)           | -1.4% (-4.3 to 1.4%)       | 0.08                       |
| 6 months, -80°C                 | -1.2% (-3.3 to 0.8%)            | -0.0% (-3.3 to 3.2%)       | 0.54                       |

**Supplemental Table 6: Sources of variation for log urinary albumin:creatinine ratio resulting from pre-analytical handling conditions, assay imprecision, within individual and between individual variation, and their effect on sample size calculations for a hypothetical albuminuria based trial**

| <b>(a) Sources of variation in log urinary albumin:creatinine ratio (uACR); combined from several studies</b> |                                    |                                     |                                                        |                                                              |                      |
|---------------------------------------------------------------------------------------------------------------|------------------------------------|-------------------------------------|--------------------------------------------------------|--------------------------------------------------------------|----------------------|
|                                                                                                               | Within-individual*<br>(from SHARP) | Between-individual*<br>(from SHARP) | Assay imprecision <sup>§</sup><br>(from laboratory QC) | Pre-analytical handling <sup>†</sup><br>(from present study) |                      |
|                                                                                                               |                                    |                                     |                                                        | With preservative                                            | Without preservative |
| <b>SD</b>                                                                                                     | 0.61                               | 0.90                                | 0.02                                                   | 0.07                                                         | 0.10                 |
| <b>Mean</b>                                                                                                   | 6.5                                | 6.5                                 | 3.3                                                    | 4.7                                                          | 4.6                  |
| <b>CV (%)</b>                                                                                                 | 9                                  | 14                                  | 0.8                                                    | 1.4                                                          | 2.2                  |
| <b>(b) Effect on sample size calculations for a hypothetical albuminuria based trial</b>                      |                                    |                                     |                                                        |                                                              |                      |
| Sources of variation                                                                                          |                                    |                                     |                                                        | Hypothetical trial sample size <sup>¶</sup>                  |                      |
| Within- and between-individual and assay imprecision without pre-analytic handling variation                  |                                    |                                     |                                                        | 188                                                          |                      |
| Within- and between-individual, assay imprecision and pre-analytical handling (with preservative)             |                                    |                                     |                                                        | 188                                                          |                      |
| Within- and between-individual, assay imprecision and pre-analytical handling (without preservative)          |                                    |                                     |                                                        | 190                                                          |                      |

\* Within-individual and between-individual CVs for 1 spot measurement derived from a one-way analysis of variance for 192 CKD patients randomized into a large clinical trial with two urine samples within 12 months and a uACR of at least 150 mg/g at baseline.<sup>1</sup>

§ Analytical CVs calculated from two levels of third party quality control material that were measured repeatedly over the time period taken for sample analysis on a Beckman-Coulter Dx800 clinical chemistry analyser.

† Pre-analytical CVs (i.e., variation introduced by different sample collection methods) calculated from the results of this study for samples stored for 4 days @18°C.

¶ The sample size required for a hypothetical trial based on all sources of variation considered together, comparing two treatments using ANCOVA with assumption of 80% power (2p=0.05) to detect a 35% absolute reduction in log uACR (i.e., a relative reduction of 30% in uACR), assuming correlation of 0.6 between successive log uACR measurements.

**References**

1. Baigent C, Landray MJ, Reith C, et al. The effects of lowering LDL cholesterol with simvastatin plus ezetimibe in patients with chronic kidney disease (Study of Heart and Renal Protection): a randomised placebo-controlled trial. *Lancet* 2011; **377**(9784): 2181-92.

# Supplemental Figure 1: Distributions of percentage change in urinary albumin:creatinine ratio following a delay in processing, by storage temperature and preservative use

## (a) Preservative

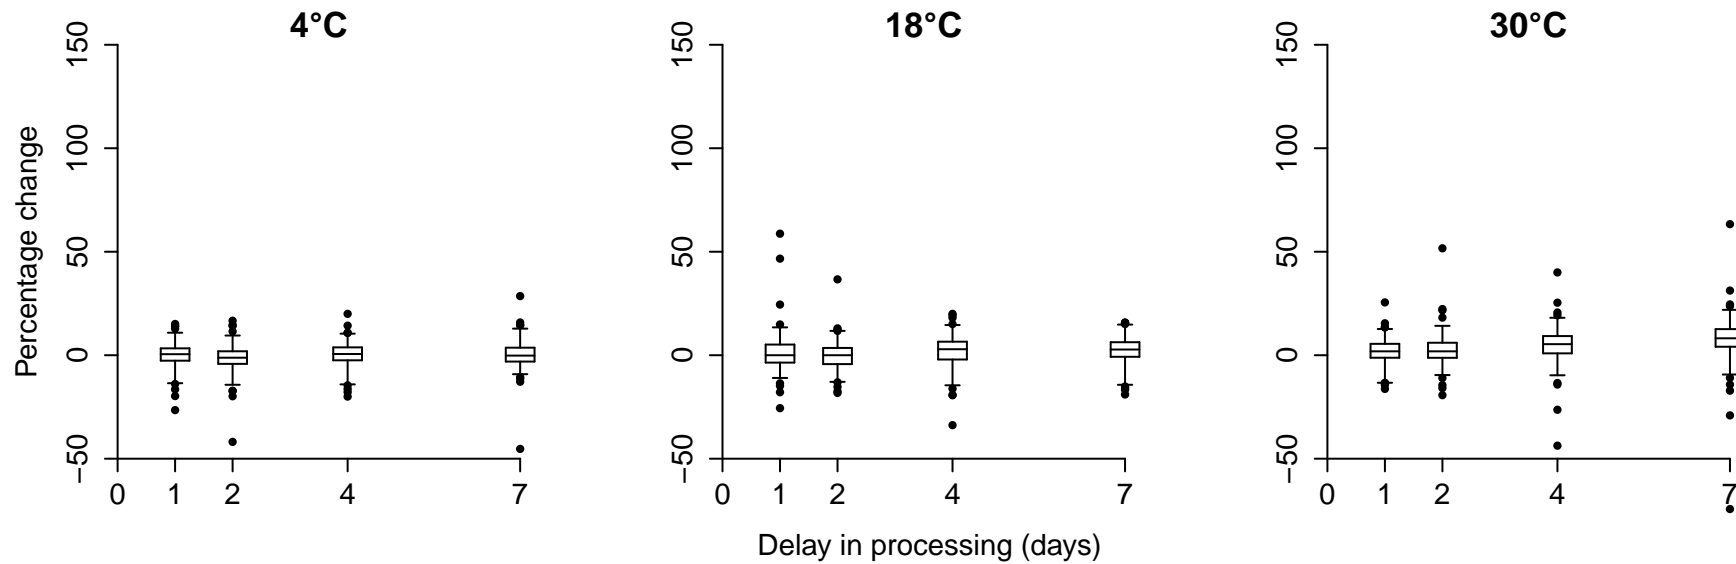

## (b) No preservative

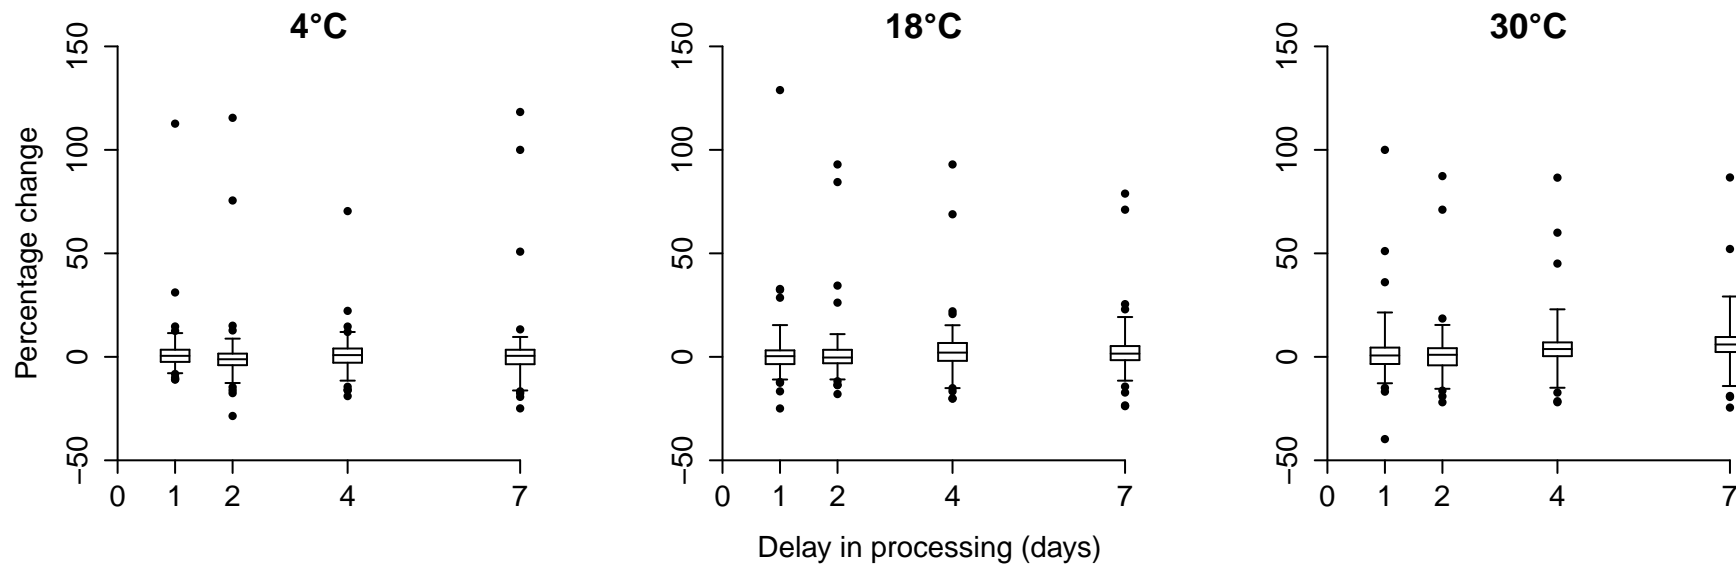

For samples without preservative stored at 30°C for 7 days, there was also a percentage change of +227% from baseline, which is not plotted here.

The boxes represent the interquartile range of the distribution, with an additional horizontal line at the median. Lines have been plotted from the 5th percentile to the 95th percentile. Any observations below the 5th percentile or above the 95th percentile are shown as separate points.

## Supplemental Figure 2: Distributions of percentage change in urine albumin concentration following a delay in processing, by storage temperature and preservative use

(a) Preservative

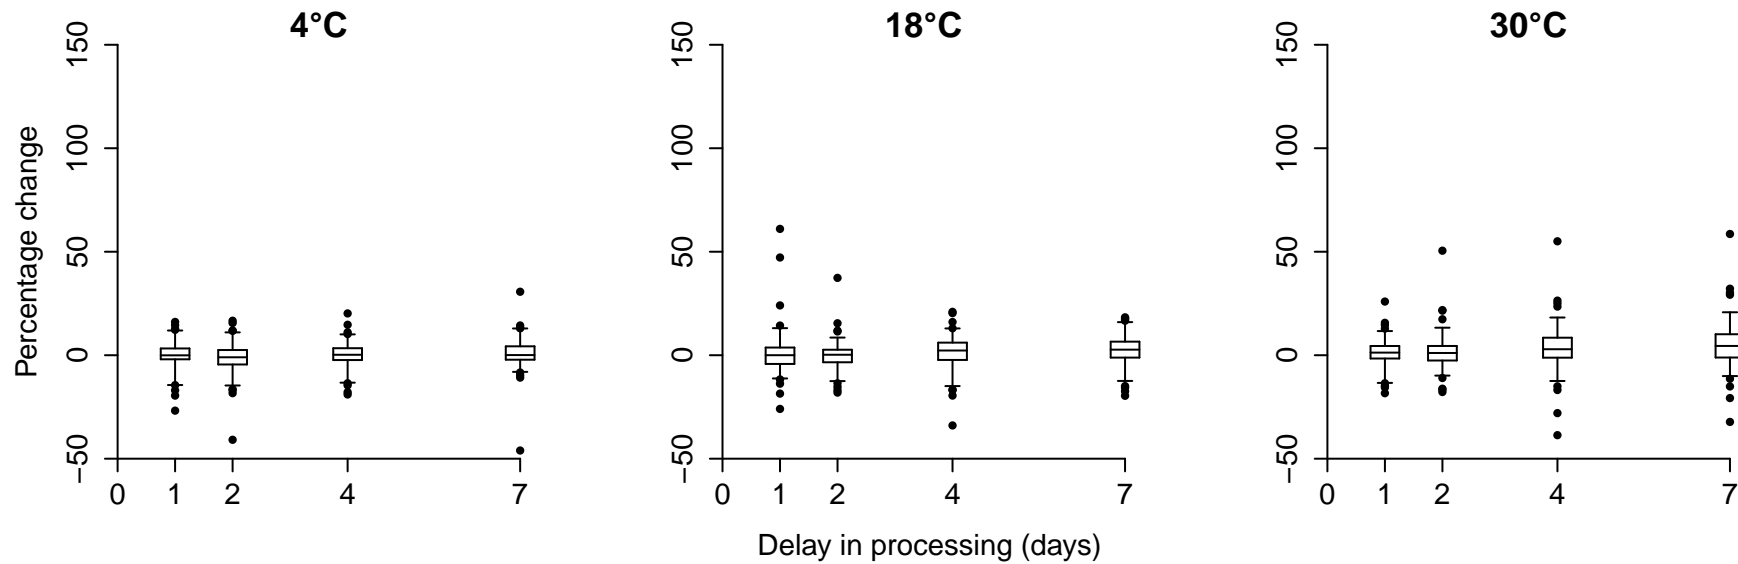

(b) No preservative

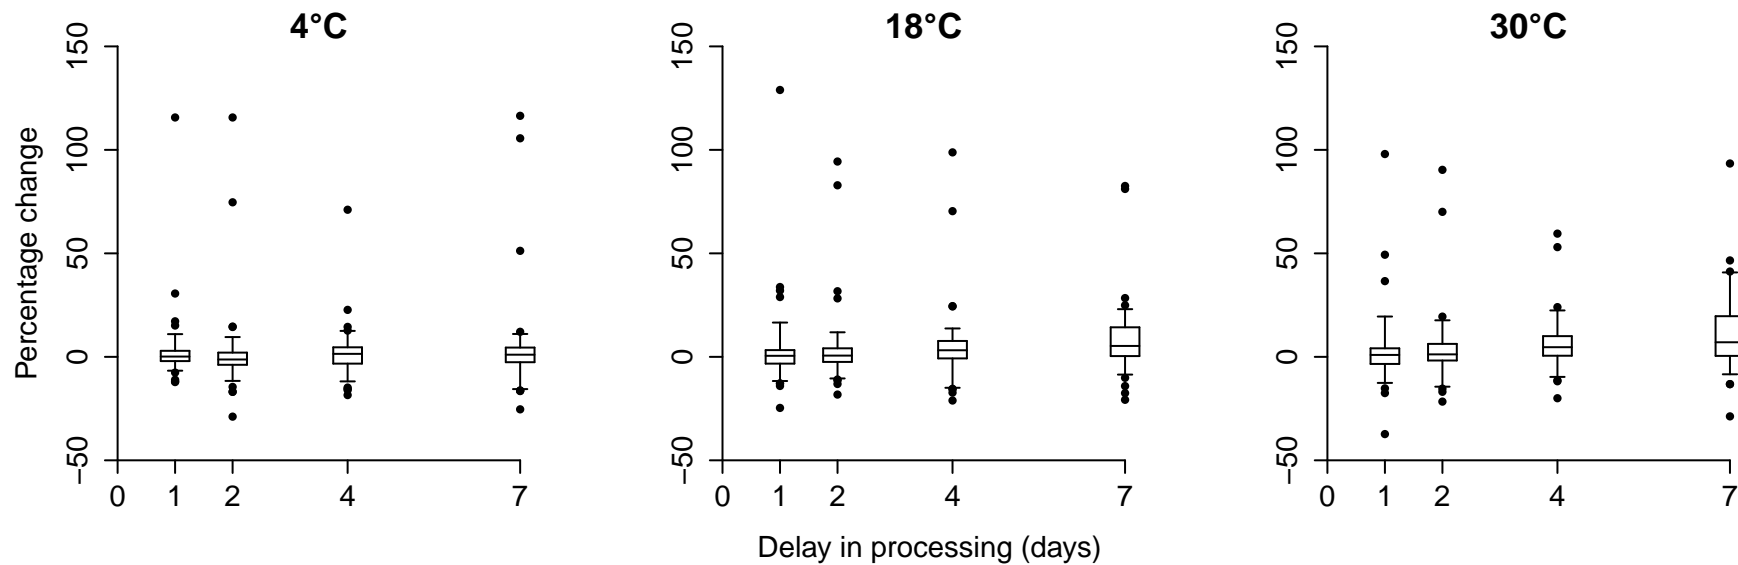

The boxes represent the interquartile range of the distribution, with an additional horizontal line at the median. Lines have been plotted from the 5th percentile to the 95th percentile. Any observations below the 5th percentile or above the 95th percentile are shown as separate points.



### Supplemental Figure 3: Distributions of percentage change in urine creatinine concentration following a delay in processing, by storage temperature and preservative use

(a) Preservative

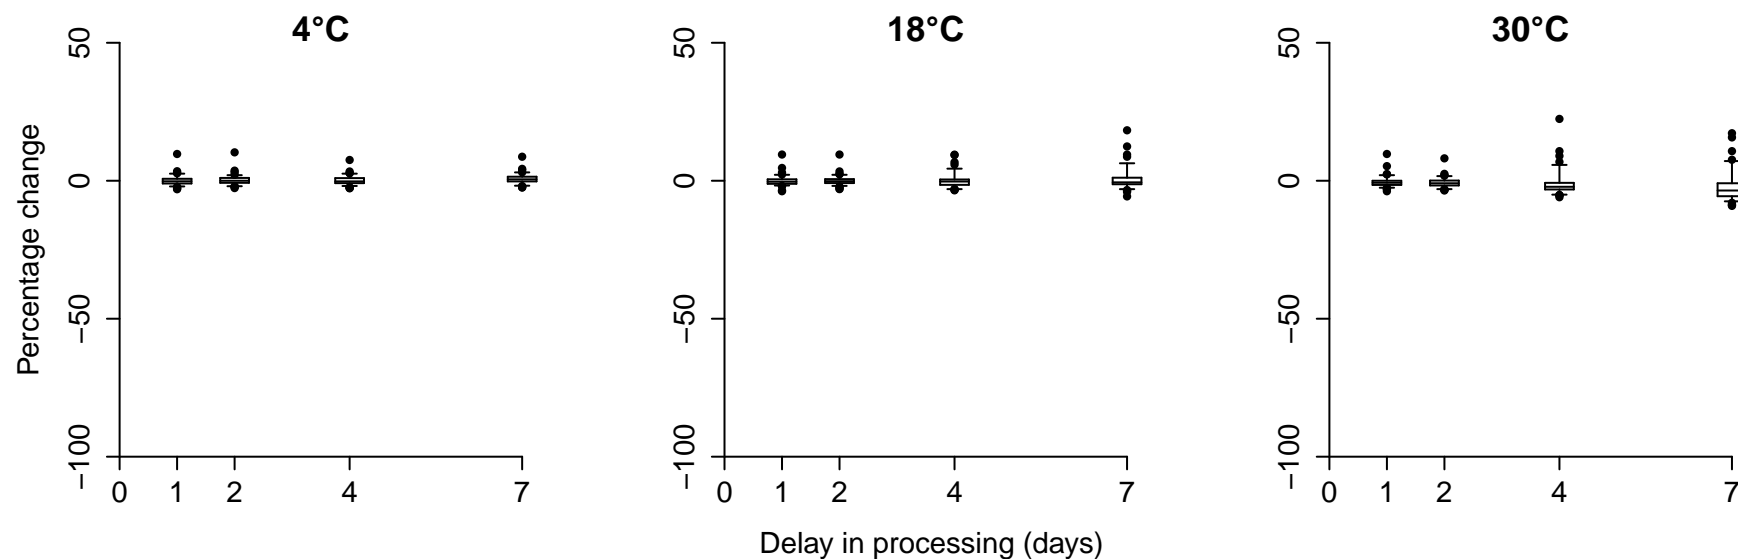

(b) No preservative

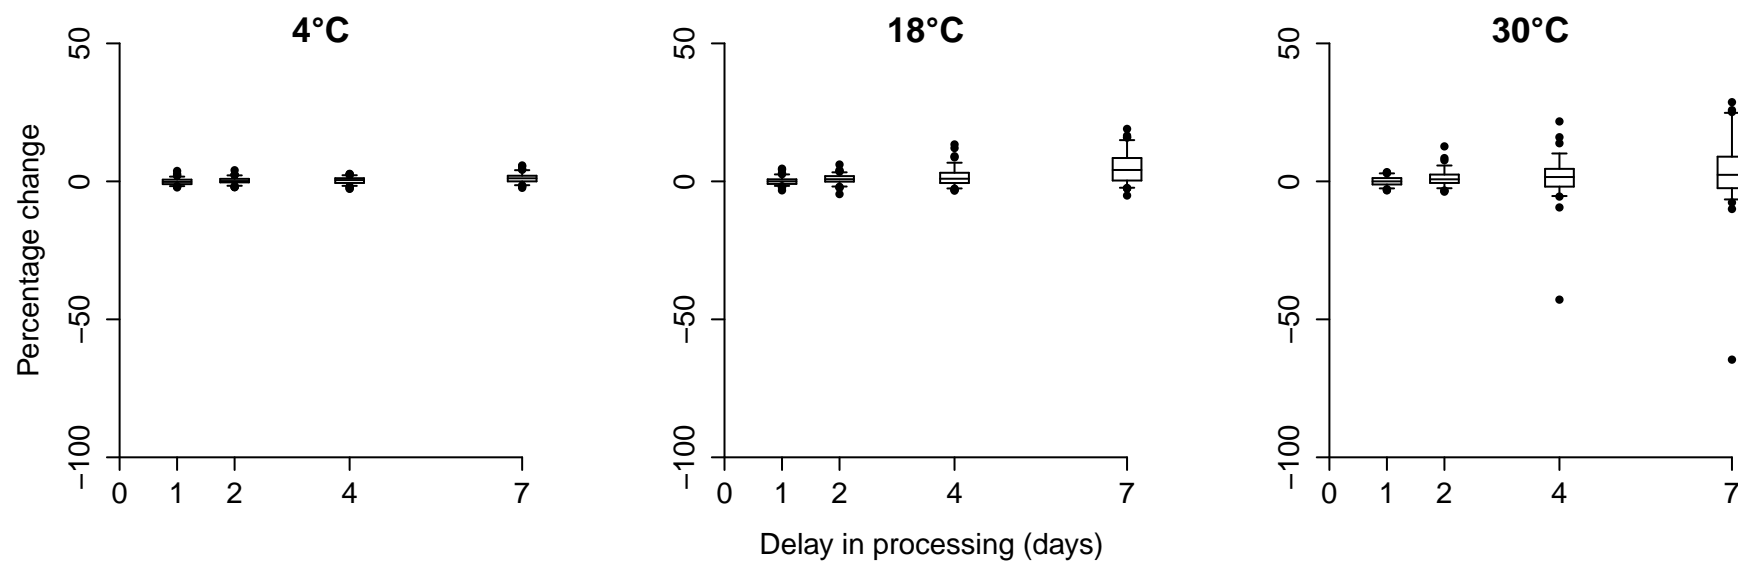

The boxes represent the interquartile range of the distribution, with an additional horizontal line at the median. Lines have been plotted from the 5th percentile to the 95th percentile. Any observations below the 5th percentile or above the 95th percentile are shown as separate points.

# Supplemental Figure 4: Distributions of percentage change in urinary creatinine concentration, albumin concentration and albumin creatinine ratio after freeze-thaw cycles, by preservative use

(a) Preservative

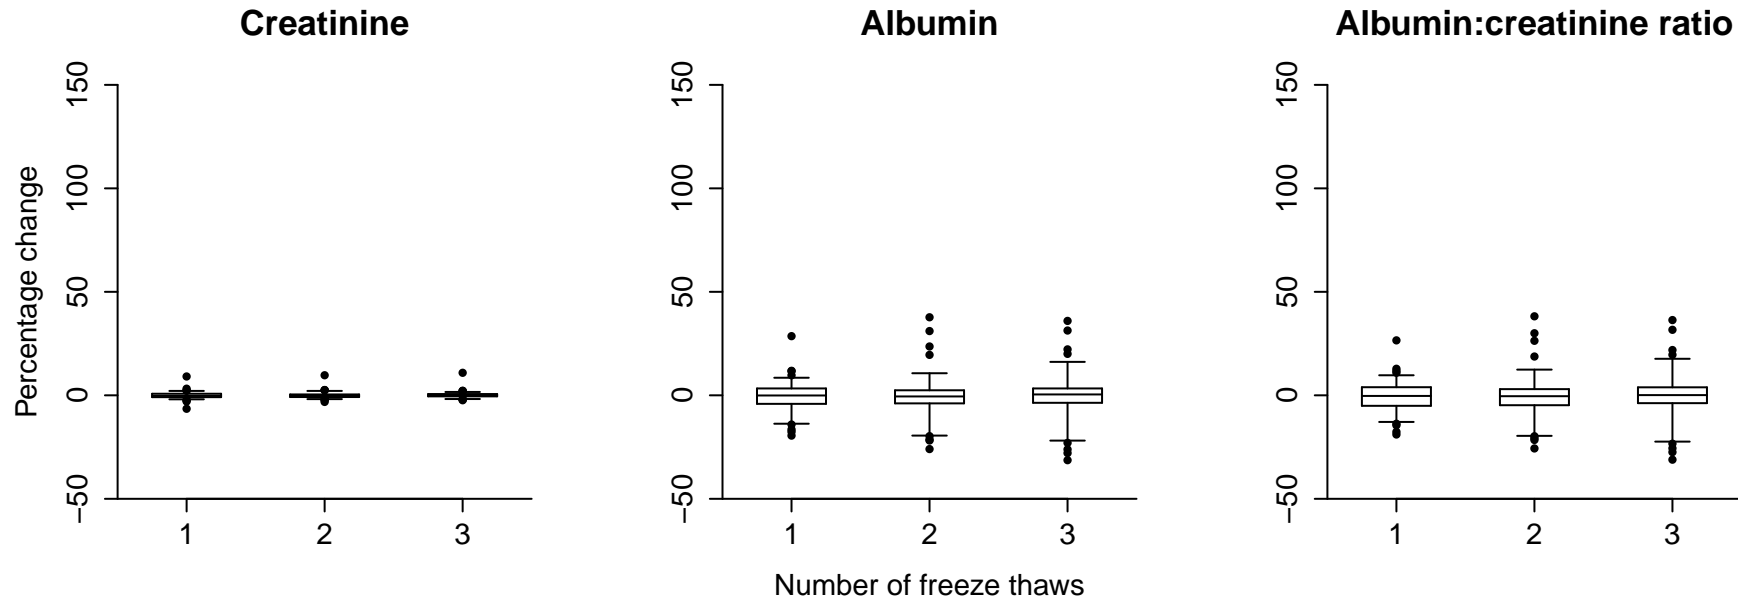

(b) No preservative

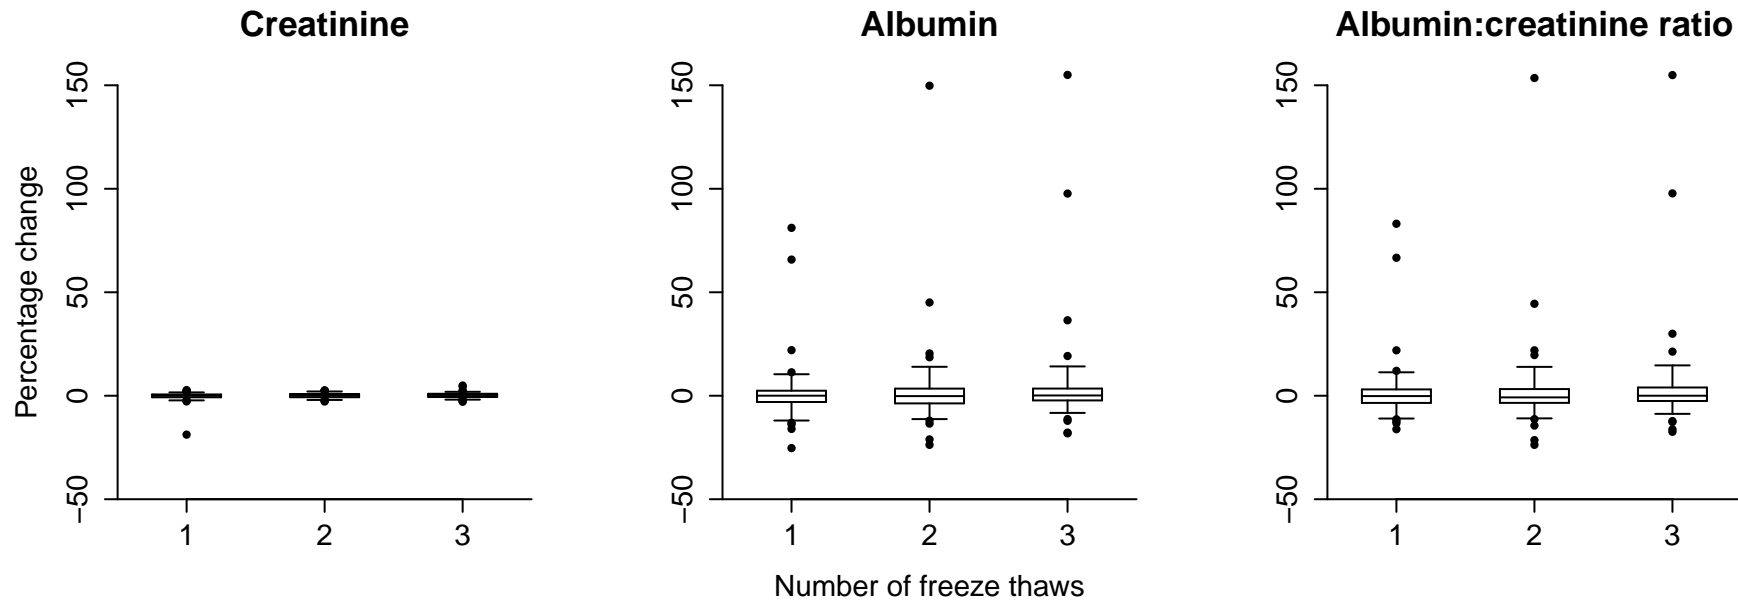

The boxes represent the interquartile range of the distribution, with an additional horizontal line at the median. Lines have been plotted from the 5th percentile to the 95th percentile. Any observations below the 5th percentile or above the 95th percentile are shown as separate points.
